# A role for the Myoblast city homologues Dock1 and Dock5 and the adaptor proteins Crk and Crk-like in zebrafish myoblast fusion

Catherine A. Moore, Caroline A. Parkin\*, Yannick Bidet<sup>†</sup> and Philip W. Ingham<sup>\*.‡</sup>

Myoblast fusion follows a defined sequence of events that is strikingly similar in vertebrates and invertebrates. Genetic analysis in *Drosophila* has identified many of the molecules that mediate the different steps in the fusion process; by contrast, the molecular basis of myoblast fusion during vertebrate embryogenesis remains poorly characterised. A key component of the intracellular fusion pathway in *Drosophila* is the protein encoded by the *myoblast city* (*mbc*) gene, a close homologue of the vertebrate protein dedicator of cytokinesis 1 (DOCK1, formerly DOCK180). Using morpholino antisense-oligonucleotide-mediated knockdown of gene activity in the zebrafish embryo, we show that the fusion of embryonic fast-twitch myoblasts requires the activities of Dock1 and the closely related Dock5 protein. In addition, we show that the adaptor proteins Crk and Crk-like (Crkl), with which Dock proteins are known to interact physically, are also required for myoblast fusion.

**KEY WORDS:** Crk, Crkl, DOCK1, DOCK5, Myoblast city, Myoblast fusion, Zebrafish

## INTRODUCTION

Skeletal muscle is composed of bundles of syncytial myotubes that arise during embryonic development by the fusion of precursor cells known as myoblasts. As well as underpinning muscle development, myoblast fusion also plays an essential role in post-embryonic life in the repair of damaged muscle fibres. Despite its fundamental importance, the molecular basis of myoblast fusion in vertebrates is still poorly understood. In *Drosophila*, by contrast, genetic analysis has provided a detailed inventory of the molecular components that underpin the process in embryonic development. Heterophilic interactions between members of the immunoglobulin superfamily – Dumbfounded (Duf; also known as Kirre), Roughest (Rst; also known as IrreC) and Sticks and stones (Sns) (Bour et al., 2000; Ruiz-Gomez et al., 2000; Strunkelberg et al., 2001) – mediate the initial contact between fusing cells (Ruiz-Gomez et al., 2000; Galletta et al., 2004), triggering intracellular pathways that orchestrate the cytoskeletal rearrangements and cell shape changes that accompany fusion (reviewed in Taylor, 2003; Chen and Olson, 2004). A key component of the intracellular network is the protein encoded by the *myoblast city* (*mbc*) gene (Rushton et al., 1995; Erickson et al., 1997), a close homologue of the vertebrate protein dedicator of cytokinesis 1 (DOCK1, formerly DOCK180) and the *Caenorhabditis elegans* protein CED-5, which, together with Mbc, define the CDM family of proteins (Wu and Horvitz, 1998).

Myoblast fusion is much less readily amenable to experimental analysis in higher vertebrates, such as the mouse; for this reason, most of what is known about the process has been gleaned from in vitro studies using various murine and human muscle cell lines. These studies have identified a large set of proteins that appear to be required

for fusion (Rosen et al., 1992; Zeschnigk et al., 1995; Schwander et al., 2003; Horsley and Pavlath, 2004; Doherty et al., 2005; Lafuste et al., 2005; Charrasse et al., 2006; Charrasse et al., 2007; Comunale et al., 2007; Georgiadis et al., 2007). Given the striking similarities between the cellular events that underpin myoblast fusion in vertebrates and invertebrates (Knudsen and Horwitz, 1977; Knudsen and Horwitz, 1978; Wakelam, 1985; Doberstein et al., 1997), there is surprisingly little, if any, overlap between these proteins and those identified by genetic analysis in *Drosophila*.

In contrast to the mouse, the zebrafish embryo has a number of qualities that makes it particularly well-suited to the in vivo analysis of myogenesis (Devoto et al., 1996; Blagden et al., 1997; Currie and Ingham, 1998; Roy et al., 2001; Henry and Amacher, 2004; Hughes, 2004). The embryonic myotome develops during the first 24 hours postfertilisation (hpf) and is comprised of two kinds of fibre: mononucleate slow-twitch fibres and multinucleate fast-twitch fibres, the latter of which arise via the fusion of precursor myoblasts (Roy et al., 2001). Muscle fibres and their progenitors can be readily imaged using confocal microscopy, and gene function can be manipulated using morpholino antisense oligonucleotides (morpholinos) (Ekker, 2000). We have taken advantage of these properties to investigate whether orthologues of the components that control myoblast fusion in *Drosophila* have a conserved function in vertebrate myogenesis. Here, we describe the establishment of a method for the quantitative analysis of fast-twitch myoblast fusion during zebrafish embryogenesis and its application to the analysis of the function of CDM family members closely related to Mbc. Because CDM proteins form part of multiple signalling pathways, the best-characterised being the Crk-CDM-Rac pathway, we have also used our assay to investigate a postulated role for the adaptor proteins Crk and Crk-like (Crkl) in myoblast fusion.

## MATERIALS AND METHODS

### PCR amplification and cloning

Zebrafish embryos were collected at 24 hpf, washed in water and RNA was extracted with Trizol (Invitrogen). Reverse transcription (RT) was performed using the Superscript RT kit (Invitrogen), and PCR was carried out using the following primers (all sequences are shown 5'-3'):

MRC Centre for Developmental and Biomedical Genetics, Department of Biomedical Science, University of Sheffield, Firth Court, Western Bank, Sheffield S10 2TN, UK.

\*Present address: Institute of Molecular and Cell Biology, 61 Biopolis Drive, Proteos, 138673, Singapore

<sup>†</sup>Present address: Génétique du Développement de la Drosophile, Institut de Génétique Humaine, 141, rue de la Cardonille, 34396 Montpellier Cedex 5, France

<sup>‡</sup>Author for correspondence (e-mail: p.w.ingham@sheffield.ac.uk)

Dock1: AGAGAAGCGAGAAAAAGTGTGTG and GTCATAGTTG-TAGACGGCCACTC, GAGTGGCCGTCTACAACTATGAC and ACAC-TGGATTGAAATGATGGAAC, AACTGGATGCTCTTTCAACAT and TTGTCCATCAGGTTTCCATAGTC; Dock5: ATTCCACTTCACTCGA-GTTTTCC and TTTCAGGGTCTAAAGTGTTTCCA, GTGCCTACAG-AATTGCCTTAGTT and TGTTGATGTATTGTGCGTAATGTG, CGGAGGGTCAATCGTACAGT and CATTGGCCAGCTCCATAGTT, TTCCAGGAATCCTCAAGTGG and GTTTTCCTCCAGCCTCACAG.

Full-length sequences of *dock1* and *dock5* were cloned by PCR using the following primers:

Dock1: AGAGAAGCGAGAAAAAGTGTGTG and GAGGTGTCAG-CTGCTTTTCC; Dock5: ATTCCACTTCACTCGAGTTTCC and CAC-AGCATGCAGTTGTTGA.

A full-length construct for *crk* was cloned using the following primers: AGGATCCACCATGGCCGAAATTTTGA and TTCTAGAAGGGCT-GTAGGTAAGACAG.

All PCR products were ligated into the TOPO-TA pCRII vector with dual promoters (Invitrogen) and sequenced.

### In situ hybridisation

Anti-sense probes for *dock1* and *dock5* were transcribed from the RT-PCR products that were cloned into the TOPO-TA pCRII vector. RNAs from several sections of the genes were pooled. In situ hybridisation was performed using standard procedures (Westerfield, 2000).

### Morpholino knockdown

Morpholino sequences were: *crk* ATG, GCCTTCCCTTCGCCTCT-CCTTATCC; *crk* splice, GGAGCAAGCCCTGCGGGATGACATT; *crkl* ATG, AGGAGTCGAACCGTGCAGACGACAT; *crkl* splice, TCATTAG-CCACTTACCTCCAGTGC; *dock1* ATG, TTTTGTAGGCACCCAG-CGCGACAT; *dock1* splice, CATCACCTGCAAACACACAACACAC; *dock5* splice 1, TGTTGATGTCTACTATGTAGGGAG; *dock5* splice 2, AAAACAGCGCTCACCTTCTGGAATG.

Morpholinos (Gene Tools) were injected at the one- to two-cell stage as previously described (Wolff et al., 2003) at 0.1–2.0 mM, in solution containing 40 ng/μl *mylz2:GFP* plasmid. This plasmid contains *EGFP* (Clontech) preceded by 2239 bp of the *mylz2* upstream region (Ju et al., 2003) amplified from genomic DNA using the following primers: TCAATCAAATATACCCCATATGTC and TGTGAAGTCTAAGAAG-ATCAAGAAGAGA. Embryos expressing the *mylz2:GFP* plasmid were washed in ice-cold PBS then fixed in 4% paraformaldehyde/PBS at 4°C overnight. Subsequently, embryos were washed in PBS + 0.1% Tween20 and mounted laterally in 75% glycerol with yolk removed. An Olympus BX61 microscope with Fluoview FV1000 confocal system and 60× water lens was used. Counting nuclei was easiest when embryos were viewed without any additional staining procedure through the microscope eyepieces at high magnification (600× total).

For morpholinos targeting splice junctions, groups of 20 injected embryos were collected at 26–28 hpf, RNA extraction and RT were performed as above, then PCR was carried out using the following primers: *crk*, GTGCTGTCTGTGTCGGAGAA and TGGTCACCTTTACCATGTGC; *crkl*, TTGGATACGACCACCTGAT and CCTTCCACTGACCACT-GAT; *dock1*, GCTGAAGCTTCTTCCAGGTG and CTTGAAGGTGAA-ACGCAGGT; *dock5* splice 1, CGGAGGGTCAATCGTACAGT and TTCTCAGGCGAGAAGGACTC; *dock5* splice 2, CGGCTTCAAGC-TGAGAGATA and CGGATATAAATGTCCCTCCCTT.

PCR products were ligated into the TOPO-TA pCRII vector with dual promoters (Invitrogen), and sequenced.

### mRNA injection

For in vitro transcription, a full-length *crk* cDNA amplified by PCR (see above) was subcloned into pCS2+ with *Bam*HI and *Xba*I. The *crkl* full-length construct was made by subcloning *crkl* from the plasmid IRAKp961A10118Q (RZPD clone) with *Spe*I and *Xba*I into the *Xba*I site of pCS2+. Full-length constructs were linearised with *Not*I and transcribed in vitro using SP6 and the mMessage Machine kit (Ambion), and the mRNA was injected into newly fertilised eggs as previously described (Krauss et al., 1993).

### Antibodies

Antibodies used were F59 [developed by Frank E. Stockdale (Miller et al., 1985) and obtained from the Developmental Studies Hybridoma Bank] (1:50) and rabbit anti-β-catenin (Sigma; 1:50). Secondary antibodies were Alexa-Fluor-488 goat anti-rabbit IgG (Molecular Probes; 1:500), goat anti-mouse Cy3 (Jackson ImmunoResearch; 1:500). DAPI (Sigma; 1:1000) was also used. Staining was performed using standard procedures.

## RESULTS

### Myoblast fusion in the zebrafish embryo

The process of fast-twitch myoblast fusion was analysed both by the global staining of fixed zebrafish embryos and by scatter labelling of fast fibres and their precursors using a *mylz2:GFP* transgene (Xu et al., 2000; Ju et al., 2003). Prior to the onset of fusion, the fast-fibre precursors were seen as small rounded cells that extended thin protrusions (Fig. 1A,D). These protrusions could best be seen when isolated cells were labelled by the *mylz2:GFP* transgene (Fig. 1D). At the 18-somite stage (18 hpf), mononucleated slow-twitch fibres were already elongated and spanned the entire length of the somite (Fig. 1B). Fast-twitch fibres elongated later; elongated fibres could be seen as fusion began, at approximately 19 hpf (20 somites) (Fig. 1E). By 26 hpf, fusion had largely finished and most fast fibres were multinucleated (Fig. 1C,F).

We performed a quantitative analysis of the process, counting nuclei in individual fast-twitch fibres highlighted by the transient mosaic expression of the *mylz2:GFP* transgene. Because varying numbers of fibres were labelled in each embryo, the mean number of nuclei/fibre for each embryo was treated as one sample value, weighting each embryo equally. Overall means of these samples are shown in Table 1, together with the total numbers of fibres scored, total number of nuclei and number of embryos analysed. From the distributions of the individual embryo means shown in Fig. 1G, it can be seen that the majority of fusion events occurred between 20 somites and 24 hpf. Mann-Whitney rank tests confirmed significant increases in the mean number of nuclei/fibre between embryos at 15 and 20 somites ( $P < 0.02$ ), 20 and 22 somites ( $P < 0.01$ ), and 22 somites and 24 hpf ( $P < 0.02$ ). Further fusion events occurred over the next 24 hours; there was a significant increase in nuclei/fibre between 30 hpf and 48 hpf ( $P < 0.04$ ). The raw data upon which this analysis is based can be found in Tables 1–6 in the supplementary material.

### Identification of the zebrafish *dock1* and *dock5* genes

Given the key role of *mbc* in myoblast fusion in *Drosophila*, we searched for orthologues of the human DOCK180 sub-family (Cote and Vuori, 2002; Meller et al., 2005) in zebrafish. One

**Table 1. Progression of fusion in wild-type embryos, from 15 somites to 48 hpf**

| Stage      | Total fibres | Total nuclei | Number of embryos | Mean of embryo means* |
|------------|--------------|--------------|-------------------|-----------------------|
| 15 somites | 113          | 113          | 6                 | 1                     |
| 20 somites | 269          | 301          | 14                | 1.19                  |
| 22 somites | 225          | 400          | 7                 | 1.73                  |
| 24 hpf     | 384          | 929          | 12                | 2.48                  |
| 26–28 hpf  | 2531         | 6730         | 77                | 2.63                  |
| 30 hpf     | 709          | 1954         | 22                | 2.81                  |
| 34 hpf     | 443          | 1156         | 12                | 2.71                  |
| 48 hpf     | 130          | 419          | 8                 | 3.23                  |

\*Mean nuclei/fibre for each embryo used as sample values, to weight each embryo equally,  $n$ =number of embryos. hpf, hours postfertilisation.

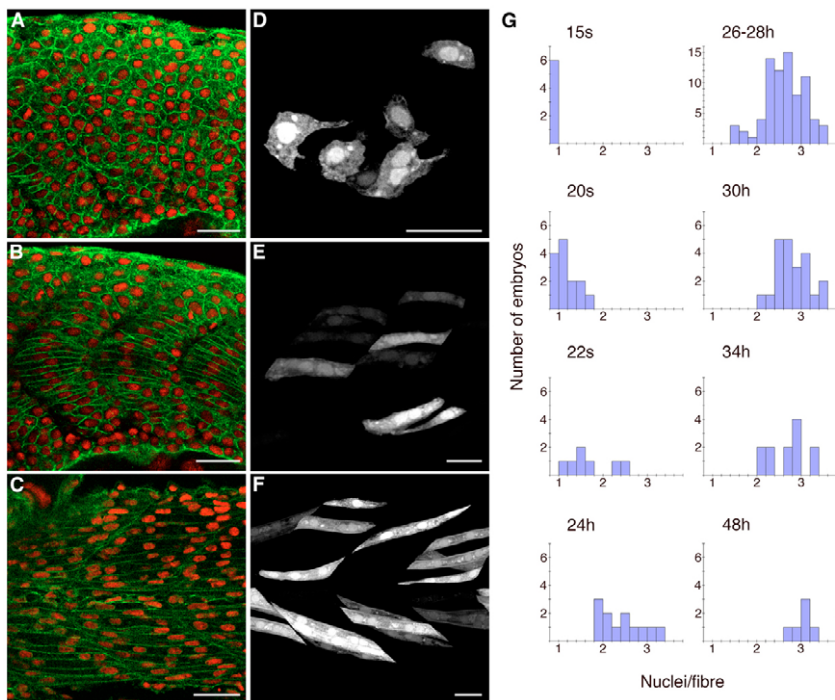

**Fig. 1. Wild-type fusion of fast-twitch myoblasts.** (A-C) Mid-trunk;  $\beta$ -catenin (green) and DAPI (red). (A) At 18 somites; optical section mid-way between the midline and the lateral surface, through fast precursors, showing unfused small rounded cells. (B) At 18 somites; optical section through medial adaxial cells, the slow-fibre precursors, which have elongated. (C) At 26 hpf; optical section through fast muscle fibres, showing multinucleate fused cells. (D-F) *mylz2:GFP* transgene expression in isolated cells. GFP labelling is found almost exclusively in fast-twitch muscle fibres, the few slow fibres that express the transgene being distinguishable by their shape and more-advanced differentiative state. (D) At 17 somites, showing small rounded mostly mononucleate cells with projections. (E) At 20 somites, showing that fusion has started to occur. Some cells are multinucleate. (F) At 26 hpf, showing elongated multinucleate fibres. (G) Quantitative data showing distributions of mean nuclei/fibre for individual wild-type embryos fixed at progressive embryonic stages, from 15 somites (15s) to 48 hpf (48h). Scale bars: 25  $\mu$ m.

member of this family, *dock2*, has previously been annotated in zebrafish and shown to be expressed specifically in macrophages (Thisse et al., 2001), a pattern reminiscent of the haematopoietic restriction of human DOCK2 (Nishihara et al., 1999). We therefore focussed our attention on the identification of the other two sub-family members, *dock1* and *dock5*. Using BLAST searches of the Sanger Ensembl zebrafish database, we identified nucleotide sequences whose conceptual translation products showed significant levels of similarity to the mammalian DOCK1 and DOCK5 proteins. By assembling overlapping database sequences, an RT-PCR strategy was devised to amplify sections of the putative zebrafish *dock1* and *dock5* genes, allowing the sequence of the full-length coding region of each gene to be determined.

Both genes encode predicted proteins with CZH1 and CZH2 domains. The CZH1 domain of CDM proteins has been shown to interact with  $\text{PtdIns}(3,4,5)\text{P}_3$  (Cote et al., 2005), whereas the CZH2 domain is a novel guanine-nucleotide exchange factor (GEF) domain that is implicated in the regulation of the small GTPase Rac1 (Reddien and Horvitz, 2000; Brugnera et al., 2002; Cote and Vuori, 2002; Meller et al., 2005). Each predicted protein also contains one or two C-terminal proline-rich sequences conforming to the SH3 consensus binding motif (P)PXLPKK (Schumacher et al., 1995; Matsuda et al., 1996), which has been shown to mediate interaction with Crk; PPPLPVK and PPPLPSK in the case of Dock1 and MPPLPAK in the case of Dock5. These are signature features of CDM proteins, although in humans, only DOCK1 contains exact (P)PXLPKK motifs. On the basis of this domain organisation and of the high level of protein similarity between the human DOCK1 (Ensembl accession ENSP00000280333) and DOCK5 (ENSP00000276440) and the corresponding zebrafish proteins (84.1% and 70.8% identity respectively), we conclude that these transcripts encode the zebrafish Dock1 and Dock5 orthologues (see Fig. S1 in the supplementary material). Exon boundaries were inferred using homology to the human proteins, and confirmed with the trace search facility on the Sanger website,

which searches the genomic shotgun sequence database. RT-PCR analysis showed expression of both genes throughout development, from the two-cell stage to 27 hpf (Fig. 2A). In situ hybridisation analysis revealed that both genes are ubiquitously expressed during the early somitogenesis stages (Fig. 2B,D), with some modulation of expression becoming apparent by 22 somites (20 hpf) (Fig. 2C,E).

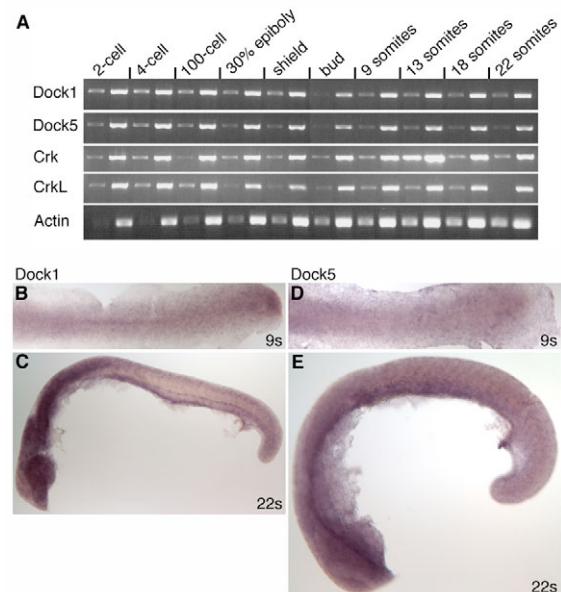

**Fig. 2. Expression of Dock1, Dock5, Crk and CrkL during embryogenesis.** (A) Reverse transcriptase (RT)-PCR analysis of *dock1*, *dock5*, *crk* and *crkL* expression, from the two-cell to 22 somite stage. Two lanes per stage; left-hand lane amplified with five PCR cycles fewer than the right-hand lane. (B-E) In situ hybridisation analysis of *dock1* and *dock5*. (B) *dock1*, 9 somites (9s). (C) *dock1*, 22 somites. (D) *dock5*, 9 somites. (E) *dock5*, 22 somites.

### Dock1 and Dock5 are required for myoblast fusion in zebrafish embryos

To investigate a possible requirement for either of the Dock proteins in myoblast fusion, we used the injection of morpholino oligonucleotides into newly fertilised wild-type embryos to block the function of these proteins. Simultaneously, we injected plasmid DNA carrying the *myl2:GFP* reporter gene in order to scatter-label fast-twitch myoblasts. The injected embryos were fixed at 26–28 hpf and analysed by confocal microscopy.

To assess the function of *dock5*, we injected splice morpholinos targeting the junctions between exons 27 and 28 (splice 1) and between exons 33 and 34 (splice 2) of this gene. The majority of labelled myocytes in the morphants were elongated and spanned the somite width (Fig. 3A,B,E), although some failed to elongate and appeared more rounded (Fig. 3A). In both cases, a substantial proportion were mononucleate. The *dock5* splice 1 morpholino caused a decrease in overall mean nuclei/fibre from 2.63 (wild-type control) to 1.36 at 0.5 mM, and the *dock5* splice 2 morpholino overall mean nuclei/fibre was 1.88 at 0.5 mM (see Table 2 for mean nuclei/fibre and Fig. 4 for distributions of individual embryo means). Using the Mann-Whitney test, the distributions of embryo means were shown to be significantly different from wild type for both groups ( $P < 0.0001$ ). Higher doses of the second splice morpholino gave a greater effect on fusion but led to a higher frequency of early arrest.

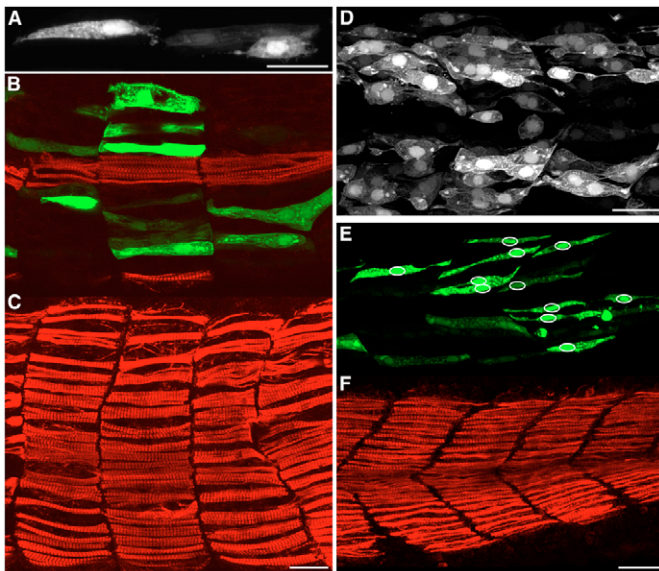

**Fig. 3. Morphant embryos show defective fast-myoblast fusion.** (A) Embryo injected with *dock5* splice 1 morpholino, showing examples in neighbouring somites of GFP-positive mononucleate cells that (left) span the somite and (right) have failed to elongate. (B,C) Embryo injected with *dock5* splice 2 morpholino, showing an example of defects in somite shape. B is more medial and shows that the GFP-positive cells are medial to the superficial slow fibres shown in C, the slow fibres in B being the medially located muscle pioneers. (D) Embryo injected with *crkl* ATG morpholino, showing an example with many mononucleate GFP-labelled cells that have failed to elongate and still extend thin processes. (E,F) Embryo injected with *dock5* splice 1 and *crkl* ATG morpholinos combined. Slow fibres are unaffected (F), although there are many mononucleate GFP-positive fast fibres (E). Circles in E indicate the positions of nuclei. All morpholinos were injected in solution containing *myl2:GFP* plasmid and were fixed at 26–28 hpf. Green, GFP of *myl2:GFP* plasmid; red, F59-antibody slow-fibre stain. Scale bars: 25  $\mu$ m.

To confirm that *myl2:GFP*-labelled mononucleate fibres are not of slow-twitch type, we stained the injected embryos with the F59 antibody, which specifically labels slow fibres at this stage (Devoto et al., 1996). None of the GFP-positive cells were labelled with the antibody. In addition, this staining revealed that the differentiation of superficial slow fibres occurs normally and on schedule in morphant embryos (Fig. 3F), although, in the more severely affected morphants, the somite shape was often disrupted such that the characteristic chevron-shape was lost (Fig. 3C). In either case, however, fusion was affected to an equal extent.

To abrogate Dock1 activity, we injected morpholinos directed against either the start ATG or the splice junction between exons 13 and 14 of the transcript. The resultant embryos were morphologically similar to the *dock5* morphants described above. Injection of the splice morpholino at two different concentrations resulted, in both cases, in a reduction in the mean number of nuclei/fibre to 1.72 (0.3 mM) or 1.31 (0.5 mM); because the higher dose resulted in a high frequency of early arrest, only the 0.3 mM data were used for statistical analysis (see Table 2 and Fig. 4). The highest number of nuclei observed in a single fibre in morphant

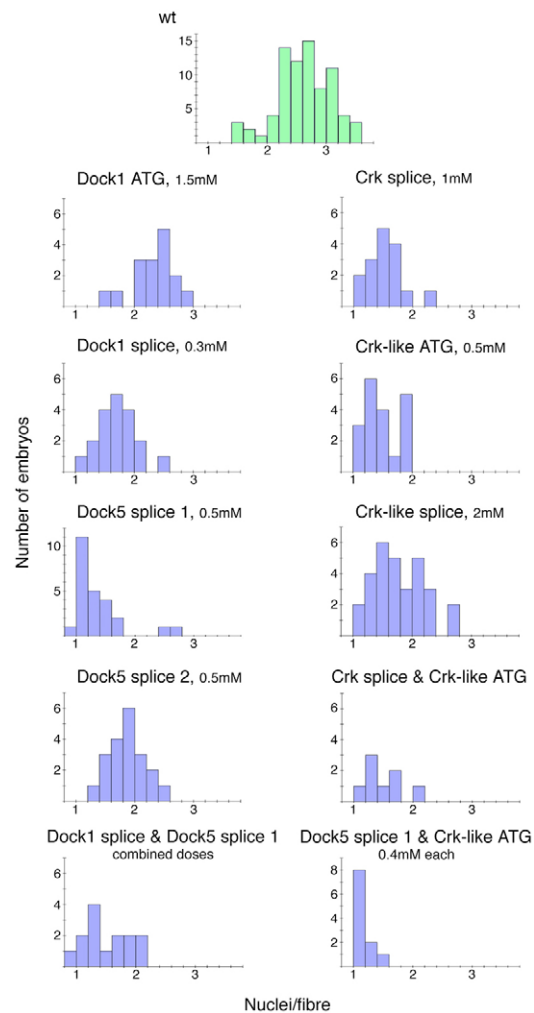

**Fig. 4. Quantitative data showing the distributions of mean nuclei/fibre for individual embryos treated with *dock1*, *dock5*, *crk* and *crkl* morpholinos.** These data are based upon injection of morpholinos at concentrations optimised to produce negligible early embryonic arrest.

**Table 2. *dock1*, *dock5*, *crk* and *crkl* morphants all show significant increases in the number of mononucleate fast fibres, at 26-28 hpf**

| Morpholino                           | Dose (mM)   | Total fibres | Total nuclei | Number of embryos | Mean of embryo means* |
|--------------------------------------|-------------|--------------|--------------|-------------------|-----------------------|
| <i>dock1</i> ATG                     | 0.5         | 293          | 692          | 5                 | 2.46                  |
|                                      | 1           | 368          | 694          | 12                | 1.89                  |
|                                      | 1.5         | 579          | 1347         | 16                | 2.35                  |
| <i>dock1</i> splice                  | 0.3         | 642          | 1168         | 19                | 1.72                  |
|                                      | 0.5         | 284          | 370          | 6                 | 1.31                  |
| <i>dock5</i> splice 1                | 0.3         | 307          | 496          | 11                | 1.66                  |
|                                      | 0.4         | 237          | 302          | 11                | 1.24                  |
|                                      | 0.5         | 667          | 862          | 25                | 1.36                  |
| <i>dock5</i> splice 2                | 0.5         | 359          | 667          | 20                | 1.88                  |
|                                      | 1           | 393          | 722          | 13                | 1.80                  |
|                                      | 2           | 77           | 136          | 6                 | 1.57                  |
| <i>crk</i> ATG                       | 0.1         | 342          | 509          | 8                 | 1.56                  |
| <i>crk</i> splice                    | 0.5         | 266          | 451          | 5                 | 1.68                  |
|                                      | 1           | 628          | 993          | 16                | 1.57                  |
| <i>crkl</i> ATG                      | 0.3         | 404          | 665          | 13                | 1.66                  |
|                                      | 0.4         | 542          | 944          | 19                | 1.74                  |
|                                      | 0.5         | 688          | 1025         | 19                | 1.49                  |
| <i>crkl</i> splice                   | 0.5         | 369          | 906          | 15                | 2.55                  |
|                                      | 2           | 773          | 1354         | 30                | 1.77                  |
| <i>dock1</i> spl & <i>dock5</i> spl1 | 0.225 & 0.3 | 383          | 649          | 8                 | 1.68                  |
|                                      | 0.3 & 0.4   | 217          | 274          | 6                 | 1.32                  |
| <i>dock5</i> spl1 & <i>crkl</i> ATG  | 0.3 & 0.3   | 366          | 477          | 13                | 1.38                  |
|                                      | 0.4 & 0.4   | 291          | 337          | 11                | 1.17                  |
| <i>crk</i> spl & <i>crkl</i> ATG     | 0.5 & 0.4   | 370          | 535          | 8                 | 1.49                  |

\*Mean nuclei/fibre for each embryo used as sample values, to weight each embryo equally,  $n$ =number of embryos. hpf, hours postfertilisation; spl, splice.

embryos was, respectively, five and three for the two different doses, compared with a maximum of seven in wild-type controls. The *dock1* ATG morpholino had a less pronounced effect, with the number of nuclei/fibre ranging from one to six, with a mean of 2.35 for the highest dose of morpholino used (1.5 mM). Further tables of raw data are presented in Tables 1-6 in the supplementary material. Using the Mann-Whitney test, the distributions of embryo means were shown to be significantly different from wild type for all these groups ( $P<0.0001$  for *dock1* splice at 0.3 mM,  $P<0.003$  for *dock1* ATG at 1.5 mM).

The efficacy of each of the splice morpholinos was assayed by RT-PCR analysis of RNA extracted from the injected embryos (Fig. 5). Sequence analysis of the amplification products showed that the *dock1* splice morpholino caused the deletion of 40 bp of exon 14, leading to the introduction of a premature stop codon. The *dock5* splice 1 morpholino led to the inclusion of 273 bp of intron 27, introducing a stop codon, and *dock5* splice 2 morpholino caused deletion of 75 bp of exon 33, which also introduced a stop.

### The adaptor proteins Crk and Crk-like (Crkl) are also required for myoblast fusion

CDM proteins interact physically with Crk and have been implicated in the same signalling pathways both in mammalian cell lines and in *C. elegans* embryos (Hasegawa et al., 1996; Reddien and Horvitz, 2000). A role for Crk in myoblast fusion in *Drosophila* has been hypothesised based on its biochemical interaction with Mbc, which mirrors that shown to be important in regulating the mammalian DOCK proteins (Galletta et al., 1999), but has not been tested directly by genetic inactivation. The presence of putative Crk-binding motifs in zebrafish Dock1 and Dock5 is consistent with both proteins interacting with Crk and/or the related protein Crkl. We therefore used our in vivo fusion assay to investigate the involvement of Crk and Crkl in vertebrate myoblast fusion.

The zebrafish *crk* and *crkl* orthologues have previously been identified in a cDNA expression screen and have been shown to be expressed ubiquitously (Thisse and Thisse, 2004). By RT-PCR, we confirmed that both genes are expressed throughout embryogenesis (Fig. 2A). To inactivate their function, we designed morpholino oligonucleotides that target the translation initiation codons and splice sites. The efficacy of the splice morpholinos was confirmed by RT-PCR and sequencing (Fig. 5). The *crk* morpholino caused some deletion of exon 2 and thus a frame shift in exon 3, whereas the *crkl* morpholino caused either inclusion of 57 bp of intron 2 and thus the introduction of a stop codon, or, more rarely, caused the deletion of exon 2. As with the Dock morphants, a large proportion of the fast myoblasts in injected embryos remained unfused at 26-28 hpf. The overall mean number of nuclei per *mylz2:GFP*-labelled cell following injection of the highest dose of the *crk* ATG or splice morpholino was 1.56 and 1.57, respectively (see Table 2 and Fig. 4). In the case of the *crkl* ATG and splice morpholinos, the mean nuclei/fibre was 1.49 and 1.77, respectively, at the highest doses. Each of these values is significantly different from those of the wild-type controls, as tested by the Mann-Whitney test ( $P<0.0001$ ). The range of phenotypes caused by the *crk* and *crkl* morpholinos was very similar to that of the Dock morphant embryos described above; in most cases, mononucleate cells extended across the length of the somite, but, in some instances, many of the cells remained rounded but extended processes (Fig. 3D).

To confirm the specificity of the *crk* and *crkl* morpholinos, we assessed whether simultaneous injection of synthetic mRNA encoding either gene product could rescue the effects of the respective morpholinos. Embryos injected with *crk* mRNA at 0.3  $\mu\text{g}/\mu\text{l}$  plus 1 mM *crk* splice morpholino had a mean number of nuclei/fibre of 2.10 ( $P>0.06$  compared to wild type, i.e. not significantly different, but  $P<0.02$  compared to splice morphants); embryos injected with *crkl* mRNA at 0.3  $\mu\text{g}/\mu\text{l}$  plus 1.5 mM *crkl* splice morpholino gave a mean number of nuclei/fibre of 2.93

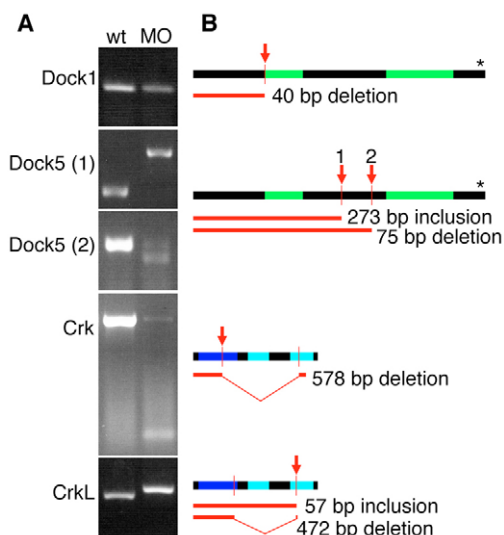

**Fig. 5. RT-PCR analysis of splice morpholino function at 26-28 hpf.**

(A) Changes in size and intensity of the amplification product between wild-type (wt) and MO-injected (MO) embryos indicates effectiveness of splice morpholinos. The *dock1* wild-type band decreased in intensity when the embryos were injected with *dock1* splice MO, although a 40 bp deletion was detectable by sequencing. *dock5* splice 1 morpholino caused inclusion of 273 bp of intron. *dock5* splice 2 morpholino caused a 75 bp deletion. *crk* morpholino caused excision of 578 bp. *crkl* morpholino mainly caused inclusion of 57 bp of intron, although a deletion of 472 bp was also detected by sequencing. All changes created premature stop codons. (B) Diagrammatic representation of the Dock and Crk protein structures and the truncations produced by the splice morpholinos. Sites recognised by morpholinos are marked with arrows. Affected exon boundaries are shown with red vertical lines. Dock proteins of the DOCK180 subfamily possess two CZH domains (green) and one or two C-terminal proline-rich PXLPK motifs (\*), which bind Crk. The adaptor proteins Crk and Crkl contain an SH2 domain (dark blue) and two SH3 domains (pale blue). The N-terminal SH3 domain binds to DOCK180 proteins.

( $P > 0.2$  compared to wild type, i.e. not significantly different, but  $P < 0.0002$  compared to splice morphants). Distributions of the embryo means for these groups injected with mRNA are shown in Fig. 6E, overall mean numbers of nuclei/fibre are in Table 3 and raw data can be found in Tables 1-6 in the supplementary material.

Significantly, we found that injection of *crk* mRNA alone (at 0.3  $\mu\text{g}/\mu\text{l}$ ) increased the overall mean number of nuclei/fibre to 3.00 ( $P < 0.004$  when compared with wild-type controls), and that *crkl* mRNA at 0.1  $\mu\text{g}/\mu\text{l}$  also caused an increase to 3.42 nuclei/fibre ( $P < 0.0002$ ). Some fibres in the injected embryos contained eight or more nuclei, exceeding the maximum seven observed in wild-type

fibres at the same stage. An example of fibres with an excessive number of nuclei is shown in Fig. 6C. This promotion of fusion was confined to fast-twitch progenitors; staining of slow-muscle fibres showed them to be mononucleated, as in wild type.

Taken together, these data reveal a requirement for Dock1, Dock5, Crk and Crkl during myoblast fusion in the zebrafish embryo. This could imply a partial redundancy of function between the pairs of related proteins; simultaneous knockdown of either Dock1 and Dock5 or of Crk and Crkl, however, resulted in only a slight enhancement of the phenotype relative to that of each single morphant (Table 2). Notably, the highest level of fusion suppression that we observed occurred in embryos injected with both *dock5* and *crkl* morpholinos (see Figs 3 and 4). The failure to suppress fusion completely most probably reflects the fact that, in no cases, was the activity of the various genes completely eliminated, as indicated by our RT-PCR analysis of splicing. Injection of higher combined doses of morpholinos also tended to increase mortality, precluding analysis of the effects of total inhibition of gene function.

## DISCUSSION

Two types of skeletal muscle fibres are formed during zebrafish embryogenesis: mononucleated slow-twitch fibres, the majority of which form a superficial layer on the surface of each somite, and multinucleated fast-twitch fibres, which constitute the bulk of the embryonic myotome. Previous studies have shown that these latter fibres arise by the fusion of myoblasts (Roy et al., 2001), a process that is specifically suppressed in the slow-twitch myoblasts by the Prdm1 transcription factor encoded by the *ubo* gene (Roy et al., 2001; Baxendale et al., 2004). Here, we have analysed the temporal progression of the fusion process and have begun to dissect its genetic control. At 18 hpf, fast-twitch myoblasts remain unfused but can be seen to be probing their environment by sending out processes; over the next 2 hours, fusion begins to occur and, by 26 hpf, the majority of myoblasts have fused to form multinucleated fibres, containing between two and seven nuclei.

In the *Drosophila* embryo, multinucleated muscle fibres similarly form by the fusion of myoblasts. In this organism, two distinct types of myoblasts have been identified: fusion-competent cells, which represent the majority of the muscle precursors, and founder cells, which play a key role in directing the type of muscle arising from the differentiation of the fusing myoblasts. When fusion is blocked by mutations that inactivate components of the fusion pathway, the founder cells proceed to differentiate into mononucleated muscle fibres whereas the unfused fusion-competent cells eventually undergo apoptosis and are engulfed by macrophages (Rushton et al., 1995; Doberstein et al., 1997). The first mutation affecting myoblast fusion to be recovered in *Drosophila* was *myoblast city* (*mbc*), which encodes the DOCK180 protein (Rushton et al., 1995; Erickson et al., 1997). Subsequent molecular and genetic analysis has revealed that DOCK180 occupies a pivotal role in a molecular pathway that

**Table 3. *crk* and *crkl* mRNA injection causes excess fusion of fast myoblasts by 26-28 hpf, and rescues splice morphants**

|                                                                        | Total fibres | Total nuclei | Number of embryos | Mean of embryo means* |
|------------------------------------------------------------------------|--------------|--------------|-------------------|-----------------------|
| Control                                                                | 1377         | 3570         | 29                | 2.56                  |
| <i>crk</i> mRNA 0.3 $\mu\text{g}/\mu\text{l}$                          | 910          | 2788         | 16                | 3.00                  |
| <i>crk</i> splice MO 1 mM                                              | 633          | 1129         | 18                | 1.75                  |
| <i>crk</i> mRNA 0.3 $\mu\text{g}/\mu\text{l}$ & Crk splice MO 1 mM     | 532          | 1205         | 17                | 2.10                  |
| <i>crkl</i> mRNA 0.1 $\mu\text{g}/\mu\text{l}$                         | 539          | 1875         | 15                | 3.42                  |
| <i>crkl</i> splice MO 1.5 mM                                           | 583          | 999          | 17                | 1.77                  |
| <i>crkl</i> mRNA 0.3 $\mu\text{g}/\mu\text{l}$ & Crkl splice MO 1.5 mM | 459          | 1408         | 14                | 2.93                  |

\*Mean nuclei/fibre for each embryo used as sample values, to weight each embryo equally,  $n$ =number of embryos.

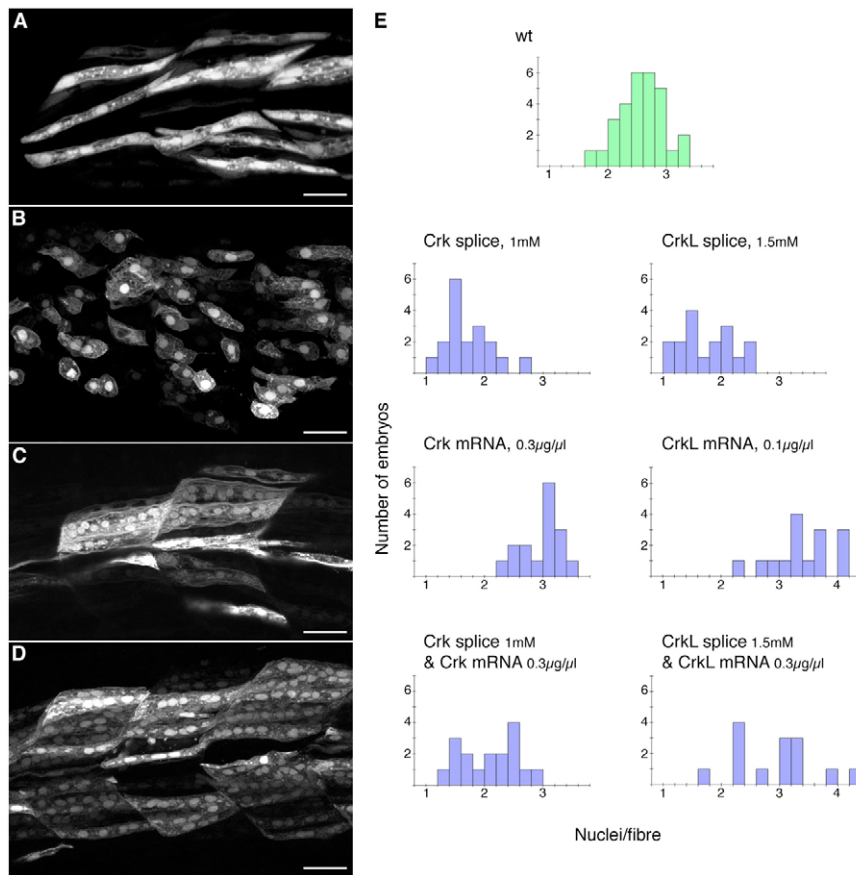

**Fig. 6. Overexpression of Crk and Crkl causes excess fusion of fast myoblasts by 26-28 hpf, and rescues splice morphants. (A-D)** Examples of GFP-positive cells in embryos injected with *mylz2:GFP* plasmid alone (A) or together with 1.5 mM of *crkl* splice morpholino (B), 0.1 µg/µl *crkl* mRNA (C), or 0.3 µg/µl *crkl* mRNA and 1.5 mM *crkl* splice morpholino combined (D). **(E)** Quantitative data showing distributions of mean nuclei/fibre for individual embryos injected with *crk* and *crkl* splice morpholinos and/or *crk* and *crkl* mRNA. Scale bars: 25 µm.

induces the rearrangement of the actin cytoskeleton in response to interactions between muscle founder and fusion-competent cells mediated by the transmembrane proteins Duf, Rst and Sns.

To investigate whether the molecular control of myoblast fusion is conserved between *Drosophila* and vertebrates, we identified homologues of DOCK180 in the zebrafish and used morpholinos to block their function. We found that knocking down two members of the DOCK180 sub-group of CDM proteins, Dock1 and Dock5, significantly compromised myoblast fusion in the zebrafish embryo. Interestingly, many of the unfused myoblasts elongated to form mononucleate muscle fibres, reminiscent of the mini-muscles formed by founder cells in *Drosophila* fusion mutants. However, we have no evidence to suggest that a similar subdivision of myoblasts into founder and fusion-competent cells occurs in the zebrafish embryo. The fact that the suppression of fusion is not complete might well reflect the failure of the morpholinos to achieve total inhibition of gene function: although those directed against splice junctions appeared more-effective than that targeting the translation start site, it seems unlikely that any of these achieved complete abrogation of function, because both *dock1* and *dock5* transcripts appeared to be maternally supplied. Indeed, given the uniform expression and probable multiple roles of both proteins in a variety of cellular processes, it would not be surprising for their complete inactivation to result in much-earlier developmental arrest. This could also explain why the simultaneous injection of *dock1* and *dock5* morpholinos resulted in only a marginal increase in the severity of the fusion phenotype.

DOCK180 was originally identified on the basis of its physical interaction with CRK, an adaptor protein that has been implicated in coupling DOCK proteins to upstream regulatory molecules

(Hasegawa et al., 1996; Galletta et al., 1999; Reddien and Horvitz, 2000). On this basis, Crk has been postulated to play a role in myoblast fusion in *Drosophila* (Chen and Olson, 2004), but, for technical reasons, such a role has not been investigated experimentally. Using the same morpholino-based approach, we asked whether Crk and the related Crkl protein are involved in myoblast fusion in the zebrafish. In both cases, we found that inhibition of expression of the gene products had a significant effect on myoblast fusion. Moreover, we found not only that loss of Crk or Crkl expression inhibited myoblast fusion, but also that overexpression of the mRNAs encoding either protein resulted in an enhancement of fusion. Taken together, these data represent definitive evidence of a role for Crk and Crkl in myoblast fusion.

Whether the requirement for Crk and Crkl in myoblast fusion that we have uncovered involves interaction with Dock1 and/or Dock5 remains to be determined. Based on its role in coupling DOCK180 proteins to upstream regulators in other signalling contexts, one possibility is that Crk and/or Crkl act to couple the transmembrane proteins required for myoblast fusion to the Mbc/DOCK1/5 proteins via other molecules, such as Rolling pebbles (also known as Antisocial; human orthologue known as TANC2) (Chen and Olson, 2001). Against this, however, a recent study has demonstrated that, in *Drosophila*, mutated forms of Mbc that lack Crk-binding motifs can rescue the *mbc* mutant phenotype, implying that, at least in flies, direct interaction between Crk and Mbc is not necessary for myoblast fusion (Balagopalan et al., 2006). Similarly, the deficiency in engulfment of apoptotic cells seen in *C. elegans* lacking the Dock1 orthologue CED-5 can be rescued by mutated forms of the protein that are unable to bind the Crk orthologue CED-2 (Tosello-Trampont et al., 2007). Nevertheless, functional analysis has

demonstrated that both Crk and Dock1 are required in *C. elegans* for this phagocytic activity, even if direct physical interaction between the two proteins is dispensable (Wu and Horvitz, 1998; Reddien and Horvitz, 2000). Thus, by analogy, the requirement for Crk and Crkl in myoblast fusion might be independent of a direct interaction with Mbc/DOCK1/5 proteins. In this context, it is notable that human CRKL and *Drosophila* Crk have been shown to interact directly with WIP (WASP-interacting protein) (Sasahara et al., 2002; Kim et al., 2007). WIP has recently been shown to have a role in myoblast fusion in *Drosophila* (Kim et al., 2007; Massarwa et al., 2007), leading to the proposal that Crk acts as a link between the transmembrane protein Sticks and stones and the WIP-WASP-Arp2/3 actin nucleation complex (Kim et al., 2007) in a pathway parallel to that mediated by Mbc. In this regard, it is notable that we found that simultaneous knockdown of Crkl and Dock5 blocked fusion almost completely in the zebrafish embryo. Further analysis of the function of these and other orthologues of the *Drosophila* myoblast fusion genes using the zebrafish model that we have established will help to elucidate further the functional relationships between these proteins.

We thank S. Roy and B. P. Srinivas for helpful discussions; S. Elworthy for providing the *myl2:GFP* transgenic construct; and the staff of the CDBG Zebrafish Aquaria for animal husbandry. Online statistics help was provided by <http://faculty.vassar.edu/lowry/VassarStats.html>. This research project was funded by a Medical Research Council (MRC) Programme Grant (G0100151) awarded to P.W.I. The CDBG Zebrafish Aquaria and Confocal facility are supported by an MRC Centre Development Grant (G0400100).

### Note added in proof

While this paper was under review, a related study describing the role of a homologue of Duf/Kirre in zebrafish myoblast fusion was published (Srinivas et al., 2007).

### Supplementary material

Supplementary material for this article is available at <http://dev.biologists.org/cgi/content/full/134/17/3145/DC1>

### References

- Balogopalan, L., Chen, M. H., Geisbrecht, E. R. and Abmayr, S. M. (2006). The "CDM" protein MBC directs myoblast fusion through a mechanism that requires PtdIns(3,4,5)P<sub>3</sub>-binding but is independent of direct interaction with DCrk. *Mol. Cell Biol.* doi:10.1128/MCB.00016-06.
- Baxendale, S., Davison, C., Muxworthy, C., Wolff, C., Ingham, P. W. and Roy, S. (2004). The B-cell maturation factor Blimp-1 specifies vertebrate slow-twitch muscle fiber identity in response to Hedgehog signaling. *Nat. Genet.* **36**, 88-93.
- Blagden, C. S., Currie, P. D., Ingham, P. W. and Hughes, S. M. (1997). Notochord induction of zebrafish slow muscle mediated by Sonic hedgehog. *Genes Dev.* **11**, 2163-2175.
- Bour, B. A., Chakravarti, M., West, J. M. and Abmayr, S. M. (2000). *Drosophila* SNS, a member of the immunoglobulin superfamily that is essential for myoblast fusion. *Genes Dev.* **14**, 1498-1511.
- Brugnera, E., Haney, L., Grimsley, C., Lu, M., Walk, S. F., Tosello-Trampont, A. C., Macara, I. G., Madhani, H., Fink, G. R. and Ravichandran, K. S. (2002). Unconventional Rac-GEF activity is mediated through the Dock180-ELMO complex. *Nat. Cell Biol.* **4**, 574-582.
- Charrasse, S., Comunale, F., Grumbach, Y., Poulat, F., Blangy, A. and Gauthier-Rouviere, C. (2006). RhoA GTPase regulates M-cadherin activity and myoblast fusion. *Mol. Biol. Cell* **17**, 749-759.
- Charrasse, S., Comunale, F., Fortier, M., Portales-Casamar, E., Debant, A. and Gauthier-Rouviere, C. (2007). M-Cadherin activates Rac1 GTPase through the Rho-GEF trio during myoblast fusion. *Mol. Biol. Cell* **18**, 1734-1743.
- Chen, E. H. and Olson, E. N. (2001). Antisocial, an intracellular adaptor protein, is required for myoblast fusion in *Drosophila*. *Dev. Cell* **1**, 705-715.
- Chen, E. H. and Olson, E. N. (2004). Towards a molecular pathway for myoblast fusion in *Drosophila*. *Trends Cell Biol.* **14**, 452-460.
- Comunale, F., Causeret, M., Favard, C., Cau, J., Taulet, N., Charrasse, S. and Gauthier-Rouviere, C. (2007). Rac1 and RhoA GTPases have antagonistic functions during N-cadherin-dependent cell-cell contact formation in C2C12 myoblasts. *Biol. Cell* doi:10.1042/BC20070011.
- Cote, J. F. and Vuori, K. (2002). Identification of an evolutionarily conserved superfamily of DOCK180-related proteins with guanine nucleotide exchange activity. *J. Cell Sci.* **115**, 4901-4913.
- Cote, J. F., Motoyama, A. B., Bush, J. A. and Vuori, K. (2005). A novel and evolutionarily conserved PtdIns(3,4,5)P<sub>3</sub>-binding domain is necessary for DOCK180 signalling. *Nat. Cell Biol.* **7**, 797-807.
- Currie, P. D. and Ingham, P. W. (1998). The generation and interpretation of positional information within the vertebrate myotome. *Mech. Dev.* **73**, 3-21.
- Devoto, S. H., Melancon, E., Eisen, J. S. and Westerfield, M. (1996). Identification of separate slow and fast muscle precursor cells in vivo, prior to somite formation. *Development* **122**, 3371-3380.
- Doberstein, S. K., Fetter, R. D., Mehta, A. Y. and Goodman, C. S. (1997). Genetic analysis of myoblast fusion: blown fuse is required for progression beyond the prefusion complex. *J. Cell Biol.* **136**, 1249-1261.
- Doherty, K. R., Cave, A., Davis, D. B., Delmonte, A. J., Posey, A., Earley, J. U., Hadhazy, M. and McNally, E. M. (2005). Normal myoblast fusion requires myoferlin. *Development* **132**, 5565-5575.
- Ekker, S. C. (2000). Morphants: a new systematic vertebrate functional genomics approach. *Yeast* **17**, 302-306.
- Erickson, M. R., Galletta, B. J. and Abmayr, S. M. (1997). *Drosophila* myoblast city encodes a conserved protein that is essential for myoblast fusion, dorsal closure, and cytoskeletal organization. *J. Cell Biol.* **138**, 589-603.
- Galletta, B. J., Niu, X. P., Erickson, M. R. and Abmayr, S. M. (1999). Identification of a *Drosophila* homologue to vertebrate Crk by interaction with MBC. *Gene* **228**, 243-252.
- Galletta, B. J., Chakravarti, M., Banerjee, R. and Abmayr, S. M. (2004). SNS: Adhesive properties, localization requirements and ectodomain dependence in S2 cells and embryonic myoblasts. *Mech. Dev.* **121**, 1455-1468.
- Georgiadis, V., Stewart, H. J., Pollard, H. J., Tavsanoglu, Y., Prasad, R., Horwood, J., Deltour, L., Goldring, K., Poirier, F. and Lawrence-Watt, D. J. (2007). Lack of galectin-1 results in defects in myoblast fusion and muscle regeneration. *Dev. Dyn.* **236**, 1014-1024.
- Hasegawa, H., Kiyokawa, E., Tanaka, S., Nagashima, K., Gotoh, N., Shibuya, M., Kurata, T. and Matsuda, M. (1996). DOCK180, a major CRK-binding protein, alters cell morphology upon translocation to the cell membrane. *Mol. Cell Biol.* **16**, 1770-1776.
- Henry, C. A. and Amacher, S. L. (2004). Zebrafish slow muscle cell migration induces a wave of fast muscle morphogenesis. *Dev. Cell* **7**, 917-923.
- Horsley, V. and Pavlath, G. K. (2004). Forming a multinucleated cell: molecules that regulate myoblast fusion. *Cells Tissues Organs* **176**, 67-78.
- Hughes, S. M. (2004). Muscle differentiation: a gene for slow muscle? *Curr. Biol.* **14**, R156-R157.
- Ju, B., Chong, S. W., He, J., Wang, X., Xu, Y., Wan, H., Tong, Y., Yan, T., Korzh, V. and Gong, Z. (2003). Recapitulation of fast skeletal muscle development in zebrafish by transgenic expression of GFP under the *myl2* promoter. *Dev. Dyn.* **227**, 14-26.
- Kim, S., Shilagardi, K., Zhang, S., Hong, S. N., Sens, K. L., Bo, J., Gonzalez, G. A. and Chen, E. H. (2007). A critical function for the actin cytoskeleton in targeted exocytosis of prefusion vesicles during myoblast fusion. *Dev. Cell* **12**, 571-586.
- Knudsen, K. A. and Horwitz, A. F. (1977). Tandem events in myoblast fusion. *Dev. Biol.* **58**, 328-338.
- Knudsen, K. A. and Horwitz, A. F. (1978). Differential inhibition of myoblast fusion. *Dev. Biol.* **66**, 294-307.
- Krauss, S., Concordet, J. P. and Ingham, P. W. (1993). A functionally conserved homologue of the *Drosophila* segment polarity gene *hh* is expressed in tissues with polarizing activity in zebrafish embryos. *Cell* **75**, 1431-1444.
- Lafuste, P., Sonnet, C., Chazaud, B., Dreyfus, P. A., Gherardi, R. K., Wewer, U. M. and Authier, F. J. (2005). ADAM12 and alpha9beta1 integrin are instrumental in human myogenic cell differentiation. *Mol. Biol. Cell* **16**, 861-870.
- Massarwa, R., Carmon, S., Shilo, B. Z. and Schejter, E. D. (2007). WIP/WASp-based actin-polymerization machinery is essential for myoblast fusion in *Drosophila*. *Dev. Cell* **12**, 557-569.
- Matsuda, M., Ota, S., Tanimura, R., Nakamura, H., Matuoka, K., Takenawa, T., Nagashima, K. and Kurata, T. (1996). Interaction between the amino-terminal SH3 domain of CRK and its natural target proteins. *J. Biol. Chem.* **271**, 14468-14472.
- Meller, N., Merlot, S. and Guda, C. (2005). CZH proteins: a new family of Rho-GEFs. *J. Cell Sci.* **118**, 4937-4946.
- Miller, J. B., Crow, M. T. and Stockdale, F. E. (1985). Slow and fast myosin heavy chain content defines three types of myotubes in early muscle cell cultures. *J. Cell Biol.* **101**, 1643-1650.
- Nishihara, H., Kobayashi, S., Hashimoto, Y., Ohba, F., Mochizuki, N., Kurata, T., Nagashima, K. and Matsuda, M. (1999). Non-adherent cell-specific expression of DOCK2, a member of the human CDM-family proteins. *Biochim. Biophys. Acta* **1452**, 179-187.
- Reddien, P. W. and Horvitz, H. R. (2000). CED-2/Crkl and CED-10/Rac control phagocytosis and cell migration in *Caenorhabditis elegans*. *Nat. Cell Biol.* **2**, 131-136.
- Rosen, G. D., Sanes, J. R., LaChance, R., Cunningham, J. M., Roman, J. and



- Dean, D. C. (1992). Roles for the integrin VLA-4 and its counter receptor VCAM-1 in myogenesis. *Cell* **69**, 1107-1119.
- Roy, S., Wolff, C. and Ingham, P. W. (2001). The u-boot mutation identifies a Hedgehog-regulated myogenic switch for fiber-type diversification in the zebrafish embryo. *Genes Dev.* **15**, 1563-1576.
- Ruiz-Gomez, M., Coutts, N., Price, A., Taylor, M. V. and Bate, M. (2000). *Drosophila* dumbfounded: a myoblast attractant essential for fusion. *Cell* **102**, 189-198.
- Rushton, E., Drysdale, R., Abmayr, S. M., Michelson, A. M. and Bate, M. (1995). Mutations in a novel gene, myoblast city, provide evidence in support of the founder cell hypothesis for *Drosophila* muscle development. *Development* **121**, 1979-1988.
- Sasahara, Y., Rachid, R., Byrne, M. J., de la Fuente, M. A., Abraham, R. T., Ramesh, N. and Geha, R. S. (2002). Mechanism of recruitment of WASP to the immunological synapse and of its activation following TCR ligation. *Mol. Cell* **10**, 1269-1281.
- Schumacher, C., Knudsen, B. S., Ohuchi, T., Di Fiore, P. P., Glassman, R. H. and Hanafusa, H. (1995). The SH3 domain of Crk binds specifically to a conserved proline-rich motif in Eps15 and Eps15R. *J. Biol. Chem.* **270**, 15341-15347.
- Schwander, M., Leu, M., Stumm, M., Dorchies, O. M., Ruegg, U. T., Schittny, J. and Muller, U. (2003). Beta1 integrins regulate myoblast fusion and sarcomere assembly. *Dev. Cell* **4**, 673-685.
- Srinivas, B. P., Woo, J., Leong, W. Y. and Roy, S. (2007). A conserved molecular pathway mediates myoblast fusion in insects and vertebrates. *Nat. Genet.* **39**, 781-786.
- Strunkelnberg, M., Bonengel, B., Moda, L. M., Hertenstein, A., de Couet, H. G., Ramos, R. G. and Fischbach, K. F. (2001). rst and its paralogue kirre act redundantly during embryonic muscle development in *Drosophila*. *Development* **128**, 4229-4239.
- Taylor, M. V. (2003). Muscle differentiation: signalling cell fusion. *Curr. Biol.* **13**, R964-R966.
- Thisse, B. and Thisse, C. (2004). Fast release clones: a high throughput expression analysis. ZDB-PUB-040907, ZFIN Direct Data Submission.
- Thisse, B., Pflumio, S., Fürthauer, M., Loppin, B., Heyer, V., Degrave, A., Woehl, R., Lux, A., Steffan, T., Charbonnier, X. Q. et al. (2001). Expression of the zebrafish genome during embryogenesis. NIH R01 RR15402, ZFIN Direct Data Submission.
- Tosello-Trampont, A. C., Kinchen, J. M., Brugnera, E., Haney, L. B., Hengartner, M. O. and Ravichandran, K. S. (2007). Identification of two signaling submodules within the Crkl/ELMO/Dock180 pathway regulating engulfment of apoptotic cells. *Cell Death Differ.* **14**, 963-972.
- Wakelam, M. J. (1985). The fusion of myoblasts. *Biochem. J.* **228**, 1-12.
- Westerfield, M. (2000). *The Zebrafish Book: A Guide for the Laboratory use of Zebrafish (Danio rerio)*. Eugene: University of Oregon Press.
- Wolff, C., Roy, S. and Ingham, P. W. (2003). Multiple muscle cell identities induced by distinct levels and timing of hedgehog activity in the zebrafish embryo. *Curr. Biol.* **13**, 1169-1181.
- Wu, Y. C. and Horvitz, H. R. (1998). *C. elegans* phagocytosis and cell-migration protein CED-5 is similar to human DOCK180. *Nature* **392**, 501-504.
- Xu, Y., He, J., Wang, X., Lim, T. M. and Gong, Z. (2000). Asynchronous activation of 10 muscle-specific protein (MSP) genes during zebrafish somitogenesis. *Dev. Dyn.* **219**, 201-215.
- Zeschnigk, M., Kozian, D., Kuch, C., Schmoll, M. and Starzinski-Powitz, A. (1995). Involvement of M-cadherin in terminal differentiation of skeletal muscle cells. *J. Cell Sci.* **108**, 2973-2981.
